# Supplementary material
Source: PubMed Central journal article supplement (PMC7561077)
Supplement: NIHMS1630956-supplement-Materials_List.pdf [file NIHMS1630956-supplement-Materials_List.pdf]

**Materials List for:**

**A Modified Lean and Release Technique to Emphasize Response Inhibition and Action Selection in Reactive Balance**

David A.E. Bolton<sup>1</sup>, Mahmoud Mansour<sup>2</sup>

<sup>1</sup>Department of Kinesiology & Health Science, Utah State University

<sup>2</sup>Department of Electrical & Computer Engineering, Utah State University

Correspondence to: David A.E. Bolton at [dave.bolton@usu.edu](mailto:dave.bolton@usu.edu)

URL: <https://www.jove.com/video/60688>

DOI: [doi:10.3791/60688](https://doi.org/10.3791/60688)

**Materials**

| Name                               | Company                      | Catalog Number                         | Comments                   |
|------------------------------------|------------------------------|----------------------------------------|----------------------------|
| CED Power1401                      | Cambridge Electronic Design  |                                        | Data acquisition interface |
| Delsys Bagnoli-4 amplifier         | Delsys                       |                                        | EMG equipment              |
| Figure-eight D70 <sup>2</sup> Coil | Magstim Company Ltd          |                                        | TMS coil                   |
| Kistler Force Plates               | Kistler Instrument Corp.     | Multicomponent Force Plate Type 9260AA | Force plates               |
| Magstim 200 stimulator             | Magstim Company Ltd          |                                        | TMS stimulation units      |
| PLATO occlusion spectacles         | Translucent Technologies Inc |                                        | visual occlusion           |
| Signal software                    | Cambridge Electronic Design  | Version 7                              |                            |
